# Supplementary material for: Engineering structure and functionalities of chemical vapor deposited photocatalytic titanium dioxide films through different types of precursors
Source: Royal Society of Chemistry journal article supplement (doi:10.1039/d1ce00081k), 2021-01-01
Supplement: d1ce00081k1.pdf [file d1ce00081k1.pdf]

**SUPPORTING INFORMATION FOR THE MANUSCRIPT**

**Engineering structure and functionalities of chemical vapor deposited photocatalytic titanium dioxide films through different types of precursors**

Diane Samélor<sup>1</sup>, Asiya Turgambaeva<sup>2</sup>, Vladislav Krisyuk<sup>2</sup>, Adeline Miquelot<sup>1</sup>, Jeremy Cure<sup>3</sup>,  
Sergey Sysoev<sup>2</sup>, Sergey Trubin<sup>2</sup>, Pavel Stabnikov<sup>2</sup>, Jérôme Esvan<sup>1</sup>, Vassilios Constandoudis<sup>4</sup>,  
Constantin Vahlas<sup>1,\*</sup>

<sup>1</sup> *CIRIMAT-CNRS, 4 allée Emile Monso, BP-44362, 31030 Toulouse Cedex 4, France*

<sup>2</sup> *Nikolaev Institute of Inorganic Chemistry SB RAS, Novosibirsk 630090, Russia*

<sup>3</sup> *LAAS-CNRS, Avenue du Colonel Roche, 31031 Toulouse, France*

<sup>4</sup> *Nanometrisis, TEPA Lefkippos, Patriarchou Grigoriou & Neapoleos 27, PO Box 60037,  
Agia Paraskevi 15341, Greece*

<sup>\*</sup> *Corresponding author. constantin.vahlas@ensiacet.fr*

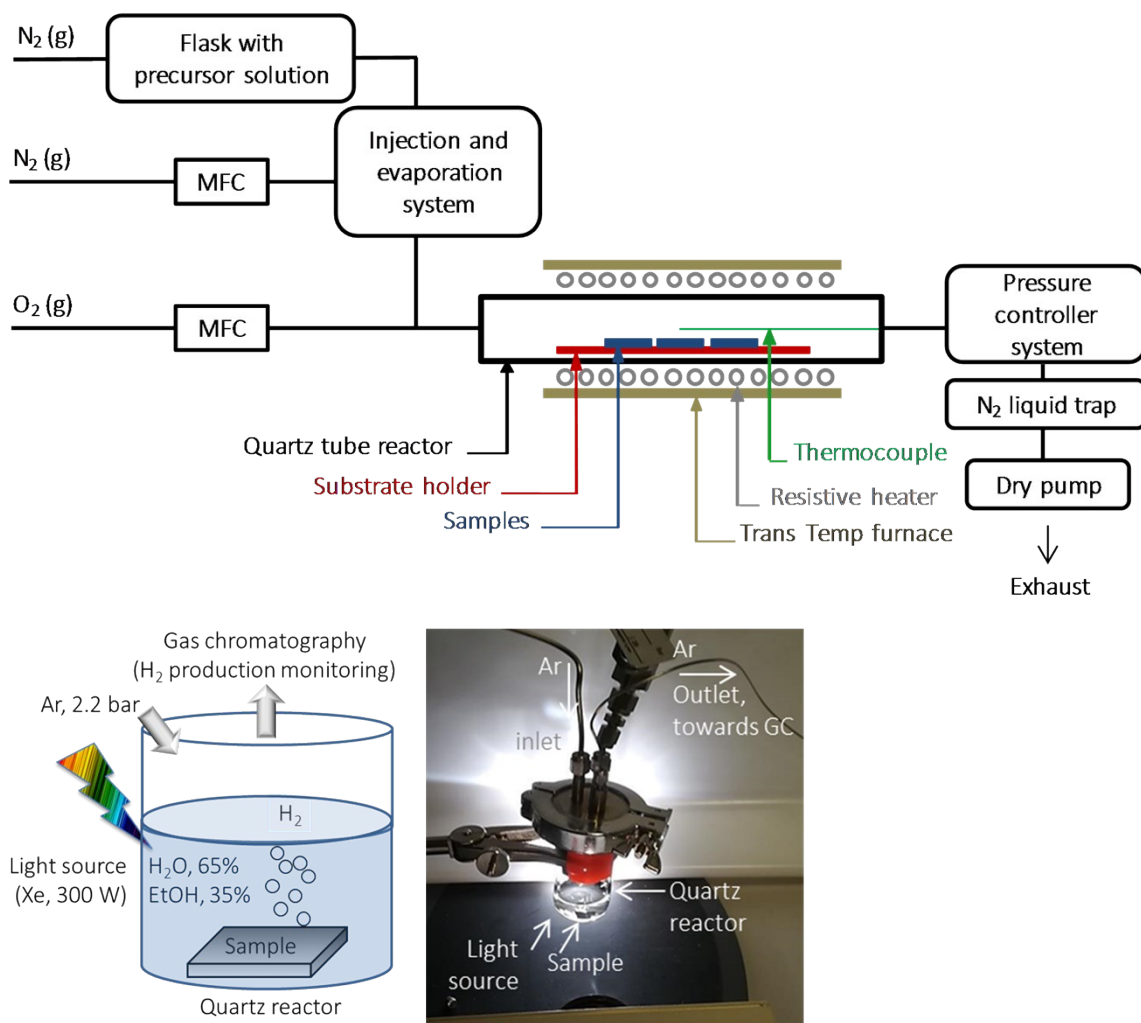

Figure S1. Schematic view of the CVD reactor (top) and schematic and a photograph of the photocatalytic setup used for dihydrogen production (bottom).

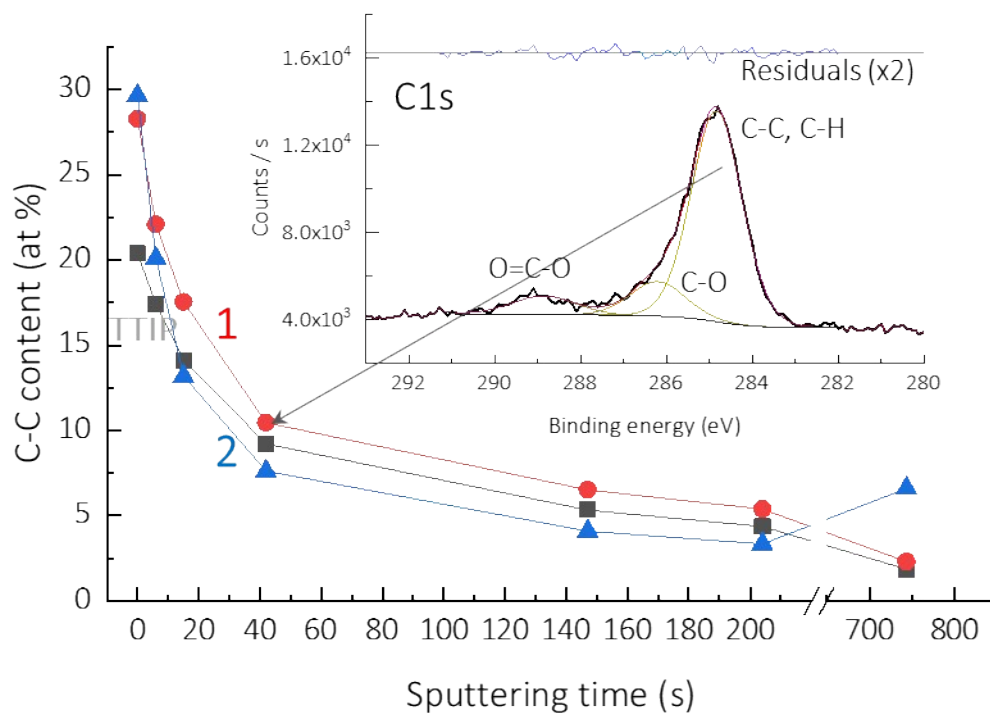

Figure S2. Evolution of the atomic concentration of the C-C component of the carbon content of the film as a function of sputtering time. The C-C/C-H component is obtained from the deconvolution of the C1s high resolution spectra, exemplified in the figure by the spectrum at 42 s of the film deposited from **1**.

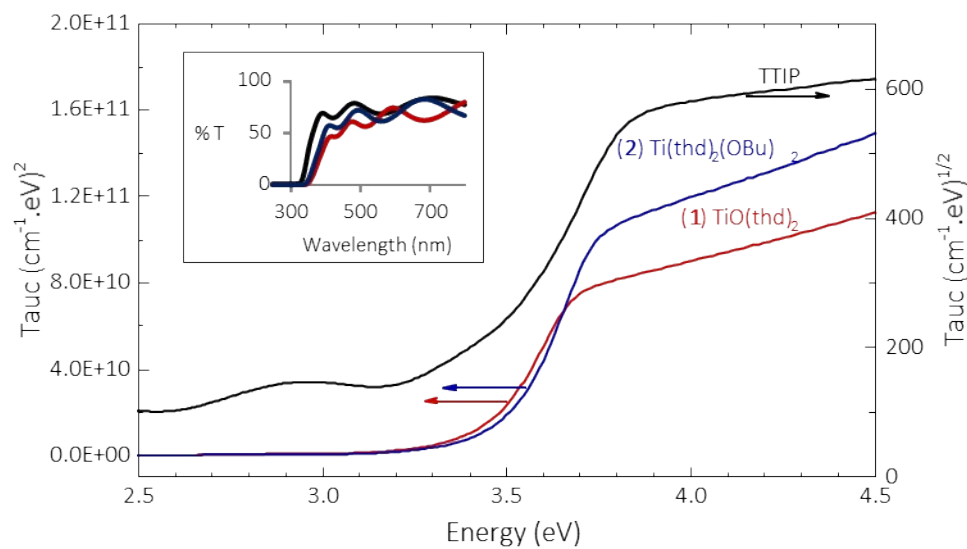

Figure S3. Tauc plots of the absorption coefficient determined by UV-Vis transmission spectroscopy for films deposited from the three precursors. Transmittance spectra of the films are in insert.
